# Supplementary material for: Relationship of phase angle and peak torque of knee extensors with the performance in six-minute step test in haemodialysis patients
Source: PubMed Central journal article supplement (PMC7869460; doi:10.1186/s12882-021-02256-7), 2021-02-08
Supplement: 12882_2021_2256_MOESM1_ESM.pdf [file 12882_2021_2256_MOESM1_ESM.pdf]

**RELATIONSHIP OF PHASE ANGLE AND PEAK TORQUE OF KNEE EXTENSORS WITH THE PERFORMANCE IN SIX-MINUTE STEP TEST IN HAEMODIALYSIS PATIENTS.**

Camila Porto Brito<sup>1</sup>, Igor Gutierrez Moraes<sup>1</sup>, Cláudio Luders<sup>1</sup>,  
Christina May Moran de Brito<sup>1</sup>, Wellington Pereira Yamaguti<sup>1</sup>

<sup>1</sup>Hospital Sírio-Libanês

Corresponding author: Wellington Pereira Yamaguti Hospital Sírio-Libanês, Rehabilitation Centre, Dona Adma Jafet Street, 91 – Bela Vista, São Paulo/SP, Brazil, 01308-050 Telephone Number +55 11 97286 0465 Email [wellington.psyamaguti@hsl.org.br](mailto:wellington.psyamaguti@hsl.org.br)

## DATA COLLECTION FORM

### 1. PERSONAL AND HEALTH HISTORY

Patient Code: \_\_\_\_\_ Date \_\_\_\_ / \_\_\_\_ / \_\_\_\_

#### Personal Data

Age group: ( ) I 18-30 ( ) II 30-40 ( ) III 40- 50 ( ) IV 50- 60 ( ) V 60-70 ( ) VI 70-80 ( ) VII >80

Name: \_\_\_\_\_

Sex ( ) F ( ) M Birth Date: \_\_\_\_ / \_\_\_\_ / \_\_\_\_ Age: \_\_\_\_ Ethnicity: \_\_\_\_\_ Marital Status: \_\_\_\_\_

Occupation: \_\_\_\_\_ ( years) Previous Occupation: \_\_\_\_\_

Scholarity: ( ) college complete ( ) incomplete college ( ) complete high school ( ) incomplete high school  
( ) literate ( ) not literate

Adress: \_\_\_\_\_

Postal code: \_\_\_\_\_ - \_\_\_\_\_ District: \_\_\_\_\_ City: ( ) São Paulo ( ) Other: \_\_\_\_\_

Phone number: ( ) \_\_\_\_\_ ( ) \_\_\_\_\_ Email: \_\_\_\_\_

#### 1.a) Life habits

( ) Smoker ( ) Ex-smoker Smoking load: \_\_\_\_\_

( ) Drink alcohol Weekly frequency: \_\_\_\_\_

( ) Sedentary ( ) Physical activity \_\_\_\_\_ Weekly frequency: \_\_\_\_\_

Physician responsible: \_\_\_\_\_

#### 1.b) Personal Background

##### Diseases:

( ) systemic arterial hypertension ( ) systemic arterial hypotension ( ) Diabetes mellitus ( ) Hypothyroidism  
( ) Dyslipidemia ( ) Stroke ( ) Coronary insufficiency ( ) acute myocardial infarction ( ) Bronchopneumonia  
( ) Tuberculosis ( ) COPD ( ) Asthma ( ) Rinithis ( ) Sinusitis ( ) Obstructive sleep apnea syndrom

Etiology of kidney disease: \_\_\_\_\_

Hemodialysis frequency: \_\_\_\_\_

Hemodialysis session duration: \_\_\_\_\_

Other diseases: \_\_\_\_\_

( ) Allergies \_\_\_\_\_

( ) Osteomioarticular diseases: \_\_\_\_\_

Previous surgeries : \_\_\_\_\_

( ) Previous hospitalization

Date of last hospital stay? \_\_\_\_\_

Reason of last hospital stay: \_\_\_\_\_

Time of last hospital stay: \_\_\_\_\_ Outcome: \_\_\_\_\_

Medications in use/ Dosage

|  |  |
|--|--|
|  |  |
|  |  |
|  |  |
|  |  |
|  |  |

### 1.c) Anthropometric Date

Date ( \_\_/\_\_/\_\_ ) Evaluator: \_\_\_\_\_

Weight: \_\_\_\_\_ Height: \_\_\_\_\_ m BMI: \_\_\_\_\_

Classification: ( ) low weight ( ) normal ( ) overweight ( ) obesity

## **2. MEDICAL RESEARCH COUNCIL**

| Medical Research Council (MRC) | Right side | Left side | Total |
|--------------------------------|------------|-----------|-------|
| Shoulder abduction             |            |           |       |
| Elbow flexion                  |            |           |       |
| Wrist extension                |            |           |       |
| Hip flexion                    |            |           |       |
| Knee extension                 |            |           |       |
| Ankle dorsiflexion             |            |           |       |

Total Score

## **3. HANDGRIP STRENGTH**

| HANDGRIP STRENGTH | 1st measure | 2nd measure | 3rd measure |
|-------------------|-------------|-------------|-------------|
| Score             |             |             |             |

Dominant Side

( ) R ( ) L

**4. SIX-MINUTE STEP TEST**

|                      |
|----------------------|
| Six Minute Step Test |
|----------------------|

| Time | Heart Rate | Respiratory frequency | Blood pressure | Peripheral Oxygen Saturation | BORG (lower limb) | BORG (dyspnea) | STEPS |
|------|------------|-----------------------|----------------|------------------------------|-------------------|----------------|-------|
|------|------------|-----------------------|----------------|------------------------------|-------------------|----------------|-------|

|                                                                   |  |  |  |  |  |  |  |
|-------------------------------------------------------------------|--|--|--|--|--|--|--|
| Rest                                                              |  |  |  |  |  |  |  |
| 1 <sup>st</sup> min                                               |  |  |  |  |  |  |  |
| 2 <sup>nd</sup> min.                                              |  |  |  |  |  |  |  |
| 3 <sup>rd</sup> min.                                              |  |  |  |  |  |  |  |
| 4 <sup>th</sup> min.                                              |  |  |  |  |  |  |  |
| 5 <sup>th</sup> min.                                              |  |  |  |  |  |  |  |
| 6 <sup>th</sup> min.<br>(FINAL)                                   |  |  |  |  |  |  |  |
| 2 <sup>nd</sup> min after<br>the end of the<br>test<br>(Recovery) |  |  |  |  |  |  |  |

Stopped during the test? Yes ( ) No ( ) Reason: \_\_\_\_\_

( ) ventilatory ( ) cardiac ( ) peripheral muscle ( ) Others \_\_\_\_\_

Total time stopped during the test: \_\_\_\_\_

Adverse event: \_\_\_\_\_

## **5. QUESTIONNAIRE 1: MALNUTRITION AND INFLAMMATION SCORE (MIS)**

### **(A).Medical History**

1. Dry weight change (after hemodialysis session) in the last three to six months?

- Without weight reduction or reduction less than 0.5kg ( 0 point )
- Weight reduction greater than 0.5kg and less than 1kg ( 1 point )
- Weight reduction greater than 1 kg and less than 5% of body weight ( 2 points )
- Weight reduction greater than 5% of body weight ( 3 points )

2. Food Intake

- Good food intake and without worsening food pattern ( 0 point )
- Ingestion of solid but sub-optimal diet (1 point )
- Just liquid diet ( 2 points )
- Hypocaloric liquid diet or fasting ( 3 points )

3. Gastrointestinal symptoms

- No symptoms with good food intake ( 0 point )
- Mild symptoms, poor food intake, occasional nausea ( 1 point )
- Moderated symptoms with frequent nausea ( 2 points )
- Frequent diarrhea, vomiting or severe anorexia ( 3 points )

4. Functional capacity

- Normal or improved functional capacity ( 0 point )
- Occasional difficulty walking or feeling tired frequently ( 1 point )
- Difficulty performing tasks that used to do without help ( 2 points )
- Restricted to bed or chair, with little or no physical activity ( 3 points )

5. Comorbidities including the number of years undergoing hemodialysis

- On hemodialysis for less than one year and feeling well ( 0 point )
- On hemodialysis between one and four years, or presence of mild comorbidities, without MC\* ( 1 point )
- On hemodialysis for more than four years or with moderate comorbidities with MC\* ( 2 points )
- Any severe or multiple comorbidity with two or more MC\* ( 3 points )

\*MC: Main Comorbidities: include chronic heart failure (functional class III and IV), AIDS, severe coronary insufficiency, moderate to severe COPD, severe neurological sequelae, metastatic cancer and recent chemotherapy.

### **(B) Physical Exam**

6. Decreased body fat reserve

- Normal ( 0 point )
- Slight ( 1 point )
- Mild ( 2 points )
- Severe ( 3 points )

7. Signs of reduced muscle mass

- Normal ( 0 point )
- Slight ( 1 point )
- Mild ( 2 points )
- Severe ( 3 points )

8. Body Mass Index (BMI)

- Greater or equal to 25kg/m<sup>2</sup> ( 0 point )
- Between 18 e 19,99kg/m<sup>2</sup>( 1 point )
- Between 16 e 17,99kg/m<sup>2</sup> ( 2 points )
- Less than 16kg/m<sup>2</sup> ( 3 points )

## 9. Serum Albumin

- Greater or equal to 4,0g/dL ( 0 point )
- Between 3,5 e 3,9g/dL ( 1 point )
- Between 3,0 e 3, 4g/dL ( 2 points )
- Less than 3,0g/dL ( 3 points )

## 10. Ferritin

- Greater or equal to 250 mg/dL ( 0 point )
- Between 200 e 249mg/dL ( 1 point )
- Between 150 e 199mg/dL ( 2 points )
- Less than 150 mg/dL ( 3 points )

TOTAL SCORE:

## **6. QUESTIONNAIRE 2: QUALITY OF LIFE QUESTIONNAIRE – (KDQOL-SF)**

## 1. In general, would you say your health is:

- |                                       |                                       |                                       |                                       |                                       |
|---------------------------------------|---------------------------------------|---------------------------------------|---------------------------------------|---------------------------------------|
| Excellent                             | Very good                             | Good                                  | Fair                                  | Poor                                  |
| <input type="checkbox"/> <sub>1</sub> | <input type="checkbox"/> <sub>2</sub> | <input type="checkbox"/> <sub>3</sub> | <input type="checkbox"/> <sub>4</sub> | <input type="checkbox"/> <sub>5</sub> |

## 2. Compared to one year ago, how would you rate your health in general now?

- |                                            |                                                |                                         |                                            |                                           |
|--------------------------------------------|------------------------------------------------|-----------------------------------------|--------------------------------------------|-------------------------------------------|
| Much better<br>now than<br>one year<br>ago | Somewhat<br>better now<br>than one<br>year ago | About the<br>same as<br>one year<br>ago | Somewhat worse<br>now than one<br>year ago | Much worse<br>now than<br>one year<br>ago |
|--------------------------------------------|------------------------------------------------|-----------------------------------------|--------------------------------------------|-------------------------------------------|



<sub>1</sub>     
 <sub>2</sub>     
 <sub>3</sub>     
 <sub>4</sub>     
 <sub>5</sub>

**3. The following items are about activities you might do. Does your health now limit you in these activities? If so, how much?**

|                                                                                                    | Yes,<br>limited<br>a lot              | Yes,<br>limited<br>a little           | No, not<br>limited<br>at all          |
|----------------------------------------------------------------------------------------------------|---------------------------------------|---------------------------------------|---------------------------------------|
| a. Vigorous activities, such as running, lifting heavy objects, participating in strenuous sports  | <input type="checkbox"/> <sub>1</sub> | <input type="checkbox"/> <sub>2</sub> | <input type="checkbox"/> <sub>3</sub> |
| b. Moderate activities, such as moving a table, pushing a vacuum cleaner, bowling, or playing golf | <input type="checkbox"/> <sub>1</sub> | <input type="checkbox"/> <sub>2</sub> | <input type="checkbox"/> <sub>3</sub> |
| c. Lifting or carrying groceries                                                                   | <input type="checkbox"/> <sub>1</sub> | <input type="checkbox"/> <sub>2</sub> | <input type="checkbox"/> <sub>3</sub> |
| d. Climbing several flights of stairs                                                              | <input type="checkbox"/> <sub>1</sub> | <input type="checkbox"/> <sub>2</sub> | <input type="checkbox"/> <sub>3</sub> |
| e. Climbing one flight of stairs                                                                   | <input type="checkbox"/> <sub>1</sub> | <input type="checkbox"/> <sub>2</sub> | <input type="checkbox"/> <sub>3</sub> |
| f. Bending, kneeling, or stooping                                                                  | <input type="checkbox"/> <sub>1</sub> | <input type="checkbox"/> <sub>2</sub> | <input type="checkbox"/> <sub>3</sub> |
| g. Walking more than a mile                                                                        | <input type="checkbox"/> <sub>1</sub> | <input type="checkbox"/> <sub>2</sub> | <input type="checkbox"/> <sub>3</sub> |
| h. Walking 500 meters                                                                              | <input type="checkbox"/> <sub>1</sub> | <input type="checkbox"/> <sub>2</sub> | <input type="checkbox"/> <sub>3</sub> |
| i. Walking 100 meters                                                                              | <input type="checkbox"/> <sub>1</sub> | <input type="checkbox"/> <sub>2</sub> | <input type="checkbox"/> <sub>3</sub> |
| j. Bathing or dressing yourself                                                                    | <input type="checkbox"/> <sub>1</sub> | <input type="checkbox"/> <sub>2</sub> | <input type="checkbox"/> <sub>3</sub> |

**4. During the past 4 weeks, have you had any of the following problems with your work or other regular daily activities as a result of your physical health?**

| Yes | No |
|-----|----|
|-----|----|

- |   |                                                                                             |                                       |                                       |
|---|---------------------------------------------------------------------------------------------|---------------------------------------|---------------------------------------|
| a | Cut down on the amount of time you spent on work or other activities?                       | <input type="checkbox"/> <sub>1</sub> | <input type="checkbox"/> <sub>2</sub> |
| b | Accomplished less than you would have liked?                                                | <input type="checkbox"/> <sub>1</sub> | <input type="checkbox"/> <sub>2</sub> |
| c | Were limited in the kind of work or other activities?                                       | <input type="checkbox"/> <sub>1</sub> | <input type="checkbox"/> <sub>2</sub> |
| d | Had difficulty performing the work or other activities (for example, it took extra effort)? | <input type="checkbox"/> <sub>1</sub> | <input type="checkbox"/> <sub>2</sub> |

**5. During the past 4 weeks, have you had any of the following problems with your work or other regular daily activities as a result of any emotional problems (such as feeling depressed or anxious)?**

| Yes | No |
|-----|----|
|-----|----|

- |   |                                                                       |                                       |                                       |
|---|-----------------------------------------------------------------------|---------------------------------------|---------------------------------------|
| a | Cut down on the amount of time you spent on work or other activities? | <input type="checkbox"/> <sub>1</sub> | <input type="checkbox"/> <sub>2</sub> |
| b | Accomplished less than you would like?                                | <input type="checkbox"/> <sub>1</sub> | <input type="checkbox"/> <sub>2</sub> |
| c | Didn't do work or other activities as carefully as usual?             | <input type="checkbox"/> <sub>1</sub> | <input type="checkbox"/> <sub>2</sub> |

6. **During the past 4 weeks, to what extent has your physical health or emotional problems interfered with your normal social activities with family, friends, neighbours, or clubs?**

|                            |                            |                            |                            |                            |
|----------------------------|----------------------------|----------------------------|----------------------------|----------------------------|
| Not at all                 | Slightly                   | Moderately                 | Quite a bit                | Extremely                  |
| <input type="checkbox"/> 1 | <input type="checkbox"/> 2 | <input type="checkbox"/> 3 | <input type="checkbox"/> 4 | <input type="checkbox"/> 5 |

7. **How much bodily pain have you had during the past 4 weeks?**

|                            |                            |                            |                            |                            |                            |
|----------------------------|----------------------------|----------------------------|----------------------------|----------------------------|----------------------------|
| None                       | Very mild                  | Mild                       | Moderate                   | Severe                     | Very severe                |
| <input type="checkbox"/> 1 | <input type="checkbox"/> 2 | <input type="checkbox"/> 3 | <input type="checkbox"/> 4 | <input type="checkbox"/> 5 | <input type="checkbox"/> 6 |

8. **During the past 4 weeks, how much did pain interfere with your normal work (including both work outside the home and housework)?**

|                            |                            |                            |                            |                            |
|----------------------------|----------------------------|----------------------------|----------------------------|----------------------------|
| Not at all                 | A little bit               | Moderately                 | Quite a bit                | Extremely                  |
| <input type="checkbox"/> 1 | <input type="checkbox"/> 2 | <input type="checkbox"/> 3 | <input type="checkbox"/> 4 | <input type="checkbox"/> 5 |

9. These questions are about how you feel and how things have been with you during the past 4 weeks. For each question, please give the one answer that comes closest to the way you have been feeling.

|                                                                        | All<br>of the time         | Most<br>of the time        | A good bit<br>of the time  | Some<br>of the time        | A little of<br>the time    | None<br>of the time        |
|------------------------------------------------------------------------|----------------------------|----------------------------|----------------------------|----------------------------|----------------------------|----------------------------|
| a. Did you feel full of life?                                          | <input type="checkbox"/> 1 | <input type="checkbox"/> 2 | <input type="checkbox"/> 3 | <input type="checkbox"/> 4 | <input type="checkbox"/> 5 | <input type="checkbox"/> 6 |
| b. Have you been a very nervous person?                                | <input type="checkbox"/> 1 | <input type="checkbox"/> 2 | <input type="checkbox"/> 3 | <input type="checkbox"/> 4 | <input type="checkbox"/> 5 | <input type="checkbox"/> 6 |
| c. Have you felt so down in the dumps that nothing could cheer you up? | <input type="checkbox"/> 1 | <input type="checkbox"/> 2 | <input type="checkbox"/> 3 | <input type="checkbox"/> 4 | <input type="checkbox"/> 5 | <input type="checkbox"/> 6 |
| d. Have you felt calm and peaceful?                                    | <input type="checkbox"/> 1 | <input type="checkbox"/> 2 | <input type="checkbox"/> 3 | <input type="checkbox"/> 4 | <input type="checkbox"/> 5 | <input type="checkbox"/> 6 |
| e. Did you have a lot of energy?                                       | <input type="checkbox"/> 1 | <input type="checkbox"/> 2 | <input type="checkbox"/> 3 | <input type="checkbox"/> 4 | <input type="checkbox"/> 5 | <input type="checkbox"/> 6 |
| f. Have you felt downhearted and unhappy?                              | <input type="checkbox"/> 1 | <input type="checkbox"/> 2 | <input type="checkbox"/> 3 | <input type="checkbox"/> 4 | <input type="checkbox"/> 5 | <input type="checkbox"/> 6 |
| g. Did you feel worn out?                                              | <input type="checkbox"/> 1 | <input type="checkbox"/> 2 | <input type="checkbox"/> 3 | <input type="checkbox"/> 4 | <input type="checkbox"/> 5 | <input type="checkbox"/> 6 |
| h. Have you been a happy person?                                       | <input type="checkbox"/> 1 | <input type="checkbox"/> 2 | <input type="checkbox"/> 3 | <input type="checkbox"/> 4 | <input type="checkbox"/> 5 | <input type="checkbox"/> 6 |
| i. Did you feel tired?                                                 | <input type="checkbox"/> 1 | <input type="checkbox"/> 2 | <input type="checkbox"/> 3 | <input type="checkbox"/> 4 | <input type="checkbox"/> 5 | <input type="checkbox"/> 6 |

10. During the past 4 weeks, how much of the time has your physical health or emotional problems interfered with your social activities (like visiting with friends, relatives, etc.)?

|                            |                            |                            |                            |                            |
|----------------------------|----------------------------|----------------------------|----------------------------|----------------------------|
| All<br>of the time         | Most<br>of the time        | Some<br>of the time        | A little<br>of the time    | None<br>of the time        |
| <input type="checkbox"/> 1 | <input type="checkbox"/> 2 | <input type="checkbox"/> 3 | <input type="checkbox"/> 4 | <input type="checkbox"/> 5 |

11. Please choose the answer that best describes how true or false each of the following statements is for you.

|                                                                 | Definitely true            | Mostly true                | Don't know                 | Mostly false               | Definitely false           |
|-----------------------------------------------------------------|----------------------------|----------------------------|----------------------------|----------------------------|----------------------------|
| a I seem to catch things a little more easily than other people | <input type="checkbox"/> 1 | <input type="checkbox"/> 2 | <input type="checkbox"/> 3 | <input type="checkbox"/> 4 | <input type="checkbox"/> 5 |
| b I am as healthy as anybody I know                             | <input type="checkbox"/> 1 | <input type="checkbox"/> 2 | <input type="checkbox"/> 3 | <input type="checkbox"/> 4 | <input type="checkbox"/> 5 |
| c I expect my health to get worse                               | <input type="checkbox"/> 1 | <input type="checkbox"/> 2 | <input type="checkbox"/> 3 | <input type="checkbox"/> 4 | <input type="checkbox"/> 5 |
| d My health is excellent                                        | <input type="checkbox"/> 1 | <input type="checkbox"/> 2 | <input type="checkbox"/> 3 | <input type="checkbox"/> 4 | <input type="checkbox"/> 5 |

**12. How true or false is each of the following statements for you?**

|                                                               | Definitely true            | Mostly true                | Don't know                 | Mostly false               | Definitely false           |
|---------------------------------------------------------------|----------------------------|----------------------------|----------------------------|----------------------------|----------------------------|
| a My kidney disease interferes too much with my life          | <input type="checkbox"/> 1 | <input type="checkbox"/> 2 | <input type="checkbox"/> 3 | <input type="checkbox"/> 4 | <input type="checkbox"/> 5 |
| b Too much of my time is spent dealing with my kidney disease | <input type="checkbox"/> 1 | <input type="checkbox"/> 2 | <input type="checkbox"/> 3 | <input type="checkbox"/> 4 | <input type="checkbox"/> 5 |
| c I feel frustrated dealing with my kidney disease            | <input type="checkbox"/> 1 | <input type="checkbox"/> 2 | <input type="checkbox"/> 3 | <input type="checkbox"/> 4 | <input type="checkbox"/> 5 |
| d I feel like a burden on my family                           | <input type="checkbox"/> 1 | <input type="checkbox"/> 2 | <input type="checkbox"/> 3 | <input type="checkbox"/> 4 | <input type="checkbox"/> 5 |

13. These questions are about how you feel and how things have been going during the past 4 weeks. For each question, please give the one answer that comes closest to the way you have been feeling.

None of the time    A little of the time    Some of the time    A good bit of the time    Most of the time    All of the time

- |   |                                                        |                            |                            |                            |                            |                            |                            |
|---|--------------------------------------------------------|----------------------------|----------------------------|----------------------------|----------------------------|----------------------------|----------------------------|
| a | Did you isolate yourself from people around you?       | <input type="checkbox"/> 1 | <input type="checkbox"/> 2 | <input type="checkbox"/> 3 | <input type="checkbox"/> 4 | <input type="checkbox"/> 5 | <input type="checkbox"/> 6 |
| b | Did you react slowly to things that were said or done? | <input type="checkbox"/> 1 | <input type="checkbox"/> 2 | <input type="checkbox"/> 3 | <input type="checkbox"/> 4 | <input type="checkbox"/> 5 | <input type="checkbox"/> 6 |
| c | Did you act irritable toward those around you?         | <input type="checkbox"/> 1 | <input type="checkbox"/> 2 | <input type="checkbox"/> 3 | <input type="checkbox"/> 4 | <input type="checkbox"/> 5 | <input type="checkbox"/> 6 |
| d | Did you have difficulty concentrating or thinking?     | <input type="checkbox"/> 1 | <input type="checkbox"/> 2 | <input type="checkbox"/> 3 | <input type="checkbox"/> 4 | <input type="checkbox"/> 5 | <input type="checkbox"/> 6 |
| e | Did you get along well with other people?              | <input type="checkbox"/> 1 | <input type="checkbox"/> 2 | <input type="checkbox"/> 3 | <input type="checkbox"/> 4 | <input type="checkbox"/> 5 | <input type="checkbox"/> 6 |
| f | Did you become confused?                               | <input type="checkbox"/> 1 | <input type="checkbox"/> 2 | <input type="checkbox"/> 3 | <input type="checkbox"/> 4 | <input type="checkbox"/> 5 | <input type="checkbox"/> 6 |

14. During the past 4 weeks, to what extent were you bothered by each of the following?

|                                 | Not at all<br>bothered     | Somewhat<br>bothered       | Moderately<br>bothered     | Very much<br>bothered      | Extremely<br>bothered      |
|---------------------------------|----------------------------|----------------------------|----------------------------|----------------------------|----------------------------|
| a Soreness in your muscles?     | <input type="checkbox"/> 1 | <input type="checkbox"/> 2 | <input type="checkbox"/> 3 | <input type="checkbox"/> 4 | <input type="checkbox"/> 5 |
| b Chest pain?                   | <input type="checkbox"/> 1 | <input type="checkbox"/> 2 | <input type="checkbox"/> 3 | <input type="checkbox"/> 4 | <input type="checkbox"/> 5 |
| c Cramps?                       | <input type="checkbox"/> 1 | <input type="checkbox"/> 2 | <input type="checkbox"/> 3 | <input type="checkbox"/> 4 | <input type="checkbox"/> 5 |
| d Itchy skin?                   | <input type="checkbox"/> 1 | <input type="checkbox"/> 2 | <input type="checkbox"/> 3 | <input type="checkbox"/> 4 | <input type="checkbox"/> 5 |
| e Dry skin?                     | <input type="checkbox"/> 1 | <input type="checkbox"/> 2 | <input type="checkbox"/> 3 | <input type="checkbox"/> 4 | <input type="checkbox"/> 5 |
| f Shortness of breath?          | <input type="checkbox"/> 1 | <input type="checkbox"/> 2 | <input type="checkbox"/> 3 | <input type="checkbox"/> 4 | <input type="checkbox"/> 5 |
| g Faintness or dizziness?       | <input type="checkbox"/> 1 | <input type="checkbox"/> 2 | <input type="checkbox"/> 3 | <input type="checkbox"/> 4 | <input type="checkbox"/> 5 |
| h Lack of appetite?             | <input type="checkbox"/> 1 | <input type="checkbox"/> 2 | <input type="checkbox"/> 3 | <input type="checkbox"/> 4 | <input type="checkbox"/> 5 |
| i Washed out or drained?        | <input type="checkbox"/> 1 | <input type="checkbox"/> 2 | <input type="checkbox"/> 3 | <input type="checkbox"/> 4 | <input type="checkbox"/> 5 |
| j Numbness in hands or feet?    | <input type="checkbox"/> 1 | <input type="checkbox"/> 2 | <input type="checkbox"/> 3 | <input type="checkbox"/> 4 | <input type="checkbox"/> 5 |
| k Nausea or upset stomach?      | <input type="checkbox"/> 1 | <input type="checkbox"/> 2 | <input type="checkbox"/> 3 | <input type="checkbox"/> 4 | <input type="checkbox"/> 5 |
| Problems with your access site? | <input type="checkbox"/> 1 | <input type="checkbox"/> 2 | <input type="checkbox"/> 3 | <input type="checkbox"/> 4 | <input type="checkbox"/> 5 |



15. Some people are bothered by the effects of kidney disease on their daily life, while others are not. How much does kidney disease bother you in each of the following areas?

|   |                                                           | Not at all<br>bothered     | Somewhat<br>bothered       | Moderately<br>bothered     | Very much<br>bothered      | Extremely<br>bothered      |
|---|-----------------------------------------------------------|----------------------------|----------------------------|----------------------------|----------------------------|----------------------------|
| a | Fluid restriction?                                        | <input type="checkbox"/> 1 | <input type="checkbox"/> 2 | <input type="checkbox"/> 3 | <input type="checkbox"/> 4 | <input type="checkbox"/> 5 |
| b | Dietary<br>restriction?                                   | <input type="checkbox"/> 1 | <input type="checkbox"/> 2 | <input type="checkbox"/> 3 | <input type="checkbox"/> 4 | <input type="checkbox"/> 5 |
| c | Your ability to work<br>around the house?                 | <input type="checkbox"/> 1 | <input type="checkbox"/> 2 | <input type="checkbox"/> 3 | <input type="checkbox"/> 4 | <input type="checkbox"/> 5 |
| d | Your ability to<br>travel?                                | <input type="checkbox"/> 1 | <input type="checkbox"/> 2 | <input type="checkbox"/> 3 | <input type="checkbox"/> 4 | <input type="checkbox"/> 5 |
| e | Being dependent on<br>doctors and other<br>medical staff? | <input type="checkbox"/> 1 | <input type="checkbox"/> 2 | <input type="checkbox"/> 3 | <input type="checkbox"/> 4 | <input type="checkbox"/> 5 |
| f | Stress or worries<br>caused by kidney<br>disease?         | <input type="checkbox"/> 1 | <input type="checkbox"/> 2 | <input type="checkbox"/> 3 | <input type="checkbox"/> 4 | <input type="checkbox"/> 5 |
| g | Your sex life?                                            | <input type="checkbox"/> 1 | <input type="checkbox"/> 2 | <input type="checkbox"/> 3 | <input type="checkbox"/> 4 | <input type="checkbox"/> 5 |
| h | Your personal<br>appearance?                              | <input type="checkbox"/> 1 | <input type="checkbox"/> 2 | <input type="checkbox"/> 3 | <input type="checkbox"/> 4 | <input type="checkbox"/> 5 |

**16. The next two questions are personal and relate to your sexual activity, but your answers are important in understanding how kidney disease impacts on people's lives. How much of a problem was each of the following in the past 4 weeks?**

|                              | Not a problem              | A little problem           | Somewhat of a problem      | Very much a problem        | Severe problem             |
|------------------------------|----------------------------|----------------------------|----------------------------|----------------------------|----------------------------|
| a Enjoying sex?              | <input type="checkbox"/> 1 | <input type="checkbox"/> 2 | <input type="checkbox"/> 3 | <input type="checkbox"/> 4 | <input type="checkbox"/> 5 |
| b Becoming sexually aroused? | <input type="checkbox"/> 1 | <input type="checkbox"/> 2 | <input type="checkbox"/> 3 | <input type="checkbox"/> 4 | <input type="checkbox"/> 5 |

**17. For the following question, please rate your sleep using a scale ranging from 0 representing "very bad" to 10 representing "very good". On a scale from 0 to 10, how would you rate your sleep overall?**

| Very bad                 |                          |                          |                          |                          |                          |                          |                          |                          |                          |                          | Very good                |
|--------------------------|--------------------------|--------------------------|--------------------------|--------------------------|--------------------------|--------------------------|--------------------------|--------------------------|--------------------------|--------------------------|--------------------------|
| 0                        | 1                        | 2                        | 3                        | 4                        | 5                        | 6                        | 7                        | 8                        | 9                        | 10                       |                          |
| <input type="checkbox"/> | <input type="checkbox"/> | <input type="checkbox"/> | <input type="checkbox"/> | <input type="checkbox"/> | <input type="checkbox"/> | <input type="checkbox"/> | <input type="checkbox"/> | <input type="checkbox"/> | <input type="checkbox"/> | <input type="checkbox"/> | <input type="checkbox"/> |

**18. How often during the past 4 weeks did you...**

|                                                                  | None of the time           | A Little of the time       | Some of the time           | A good bit of the time     | Most of the time           | All of the time            |
|------------------------------------------------------------------|----------------------------|----------------------------|----------------------------|----------------------------|----------------------------|----------------------------|
| a Awaken during the night and have trouble falling asleep again? | <input type="checkbox"/> 1 | <input type="checkbox"/> 2 | <input type="checkbox"/> 3 | <input type="checkbox"/> 4 | <input type="checkbox"/> 5 | <input type="checkbox"/> 6 |
| b Get the amount of sleep you need?                              | <input type="checkbox"/> 1 | <input type="checkbox"/> 2 | <input type="checkbox"/> 3 | <input type="checkbox"/> 4 | <input type="checkbox"/> 5 | <input type="checkbox"/> 6 |
| c Have trouble staying awake during the day?                     | <input type="checkbox"/> 1 | <input type="checkbox"/> 2 | <input type="checkbox"/> 3 | <input type="checkbox"/> 4 | <input type="checkbox"/> 5 | <input type="checkbox"/> 6 |



**23. Think about the care you receive for kidney dialysis. In terms of your satisfaction, how would you rate the friendliness and interest shown in you as a person?**

|                            |                            |                            |                            |                            |                            |                            |
|----------------------------|----------------------------|----------------------------|----------------------------|----------------------------|----------------------------|----------------------------|
| Very poor                  | Poor                       | Fair                       | Good                       | Very good                  | Excellent                  | The Best                   |
| <input type="checkbox"/> 1 | <input type="checkbox"/> 2 | <input type="checkbox"/> 3 | <input type="checkbox"/> 4 | <input type="checkbox"/> 5 | <input type="checkbox"/> 6 | <input type="checkbox"/> 7 |

**24. How true or false is each of the following statements?**

|   |                                                              |                            |                            |                            |                            |                            |
|---|--------------------------------------------------------------|----------------------------|----------------------------|----------------------------|----------------------------|----------------------------|
|   | Definitely true                                              | Mostly true                | Don't know                 | Mostly false               | Definitely false           |                            |
| a | Dialysis staff encourage me to be as independent as possible | <input type="checkbox"/> 1 | <input type="checkbox"/> 2 | <input type="checkbox"/> 3 | <input type="checkbox"/> 4 | <input type="checkbox"/> 5 |
| b | Dialysis staff support me in coping with my kidney disease   | <input type="checkbox"/> 1 | <input type="checkbox"/> 2 | <input type="checkbox"/> 3 | <input type="checkbox"/> 4 | <input type="checkbox"/> 5 |
